# Supplementary material
Source: PubMed Central journal article supplement (PMC4760212)
Supplement: MCB.00828-15_zmb999101142so1.pdf [file MCB.00828-15_zmb999101142so1.pdf]

## SUPPLEMENTARY INFORMATION LEGENDS

**Figure S1. Time course of GSK-3 $\beta$  stimulation by Wnt ligands (100 ng/ml).** Changes in the intracellular localization of PKC $\zeta$  and GSK-3 $\beta$  occur in a short time (5 min) while after 15 min, this returns to baseline in both non-malignant 112CoN cells (panel A) and malignant RKO and SW480 cells (panels B and C, respectively). Cells were fixed, permeabilized and co-immunostained with antibodies against GSK-3 $\beta$  and against PKC $\zeta$ . Fluorescence was analyzed by laser confocal microscopy as described in the Experimental Procedures section. PKC $\zeta$  was visualized with FITC-conjugated goat anti-rabbit antibody and GSK-3 $\beta$  with rhodamine goat anti-mouse antibody. Data are representative of three independent experiments.

**Figure S2.** Efficiency of the knockdown of PKC $\zeta$ . RKO or SW480 cells were transfected with 2  $\mu$ g of pSuperPKC $\zeta$ -RNAi plasmid or with control pSuper plasmid using Lipofectamine 2000. The efficiency of the silencing of PKC $\zeta$  was determined 36 h post-transfection of cells by Western blot.

**Figure S3. *In silico* analysis of the GSK-3 $\beta$  aminoacid sequence showing the putative PKC phosphorylation sites in GSK-3 $\beta$ .** The sites obtained from the analysis appear underlined in black; three sites displaying the classical PKC consensus sequence with high probability score are underlined in red, and the Serine 147, that exactly matched with the

consensus sequence recognized by the P-Ser-PKC-substrate antibody used in the experiments (R/K<sub>(0-2)</sub> Ser X<sub>(hydrophobic)</sub>R/K) is shown underlined with a curly red line.

**Figure S4. Efficiency of transfection of GSK-3 $\beta$  wild-type, GSK-3 $\beta$ /S147A and GSK-3 $\beta$ /S147E.** RKO cells were transfected with the void plasmid (vector) or with plasmid-encoding wild type GSK-3 $\beta$  or plasmid-encoding GSK-3 $\beta$  mutants. GSK-3 $\beta$  was immunoprecipitated 24 h post-transfection from cell extracts and analyzed by Western blot. Actin antibody was used to control for equal loading. The results are representative of three independent experiments using different cell preparations.

**A****Control**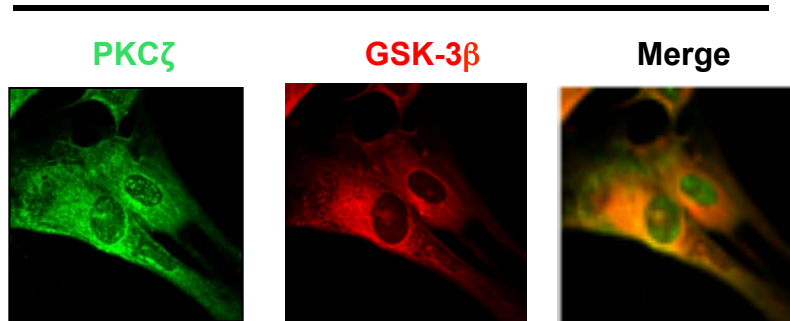**Wnt3a**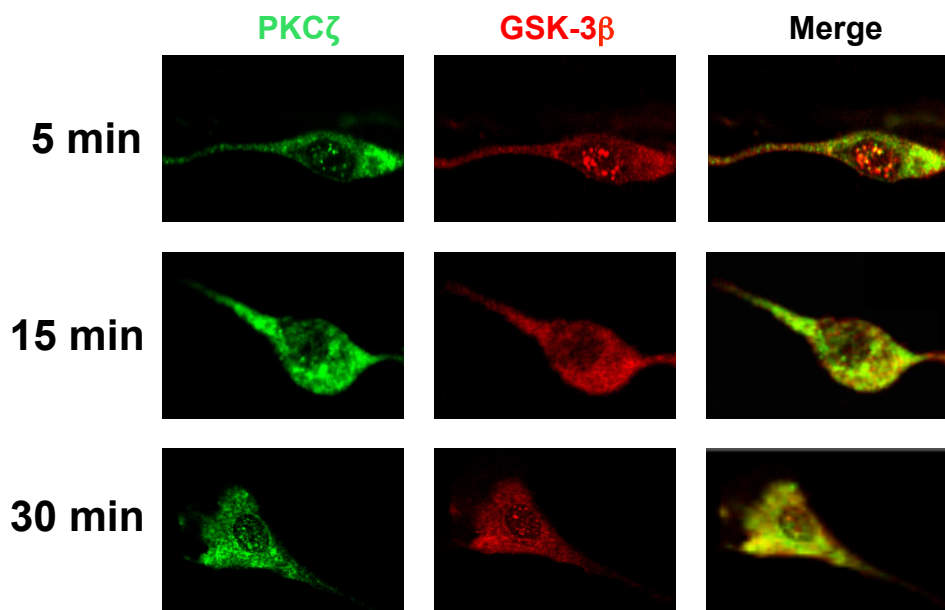**Wnt5a**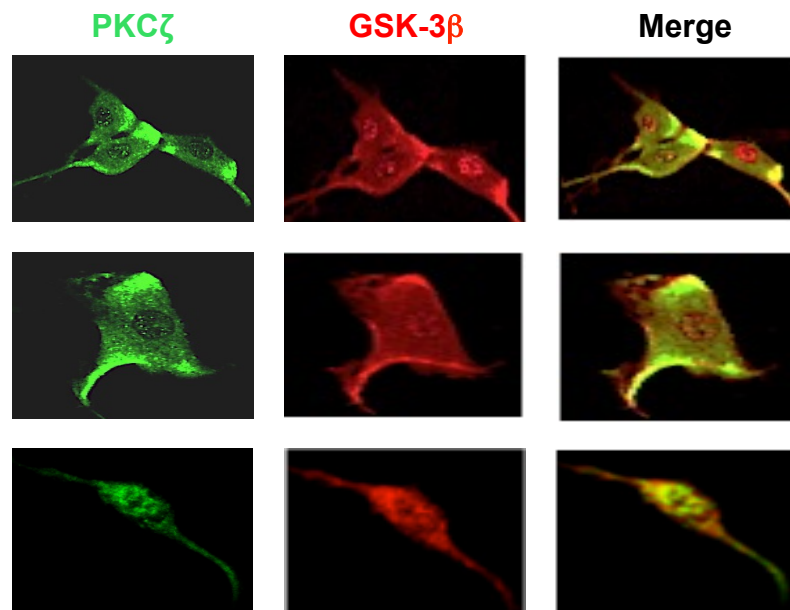**Figure S1A**

**B****Control**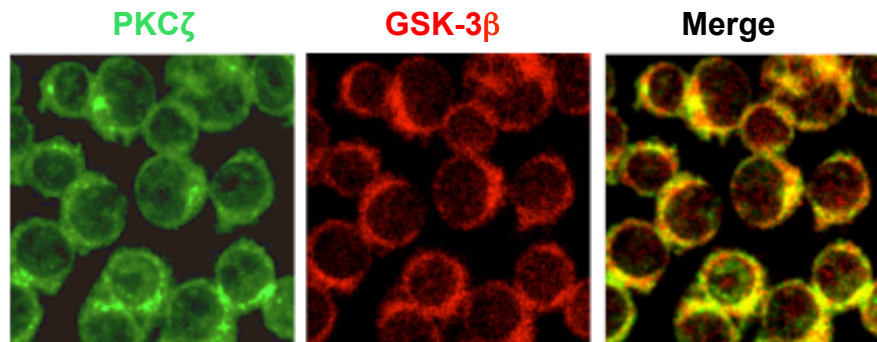**Figure 1S B****Wnt3a**

PKC $\zeta$       GSK-3 $\beta$       Merge

**5 min**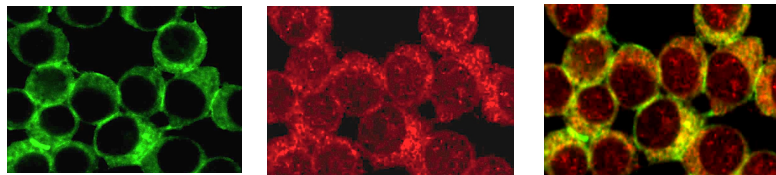**15 min**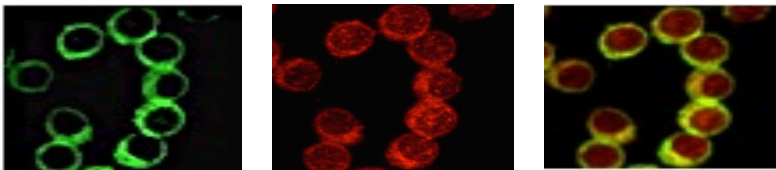**30 min**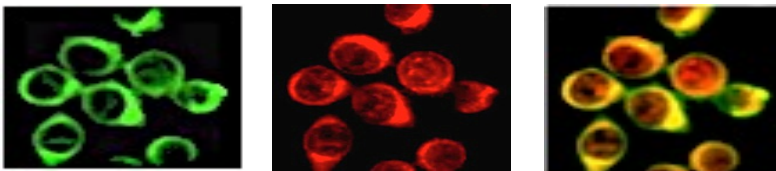**Wnt5a**

PKC $\zeta$       GSK-3 $\beta$       Merge

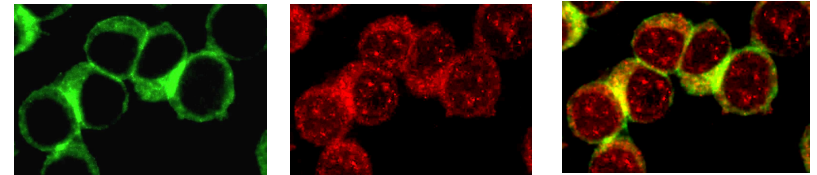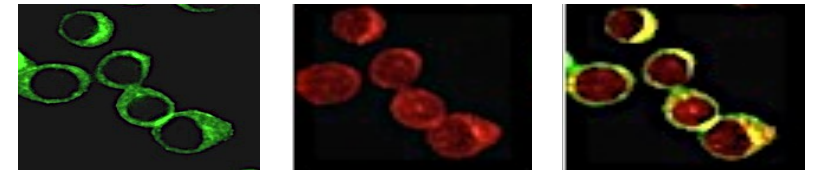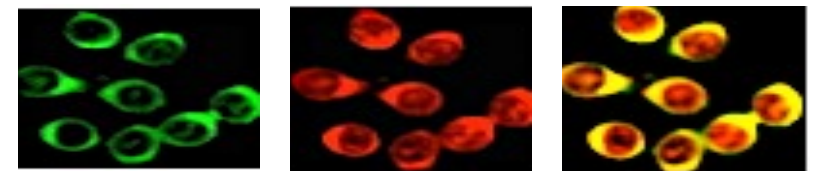

**C****Control**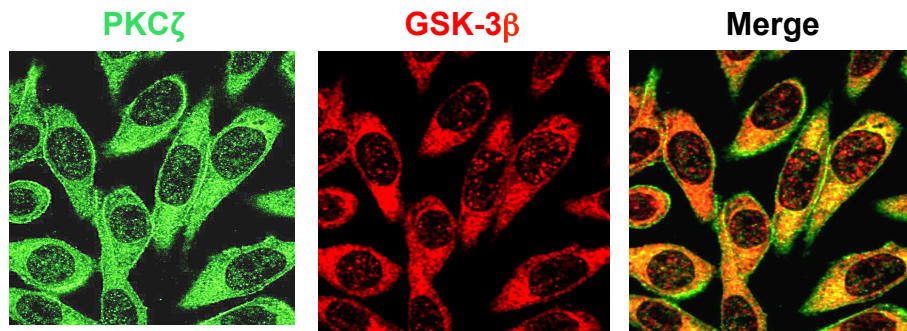**Figure 1S C****Wnt3a****Wnt5a**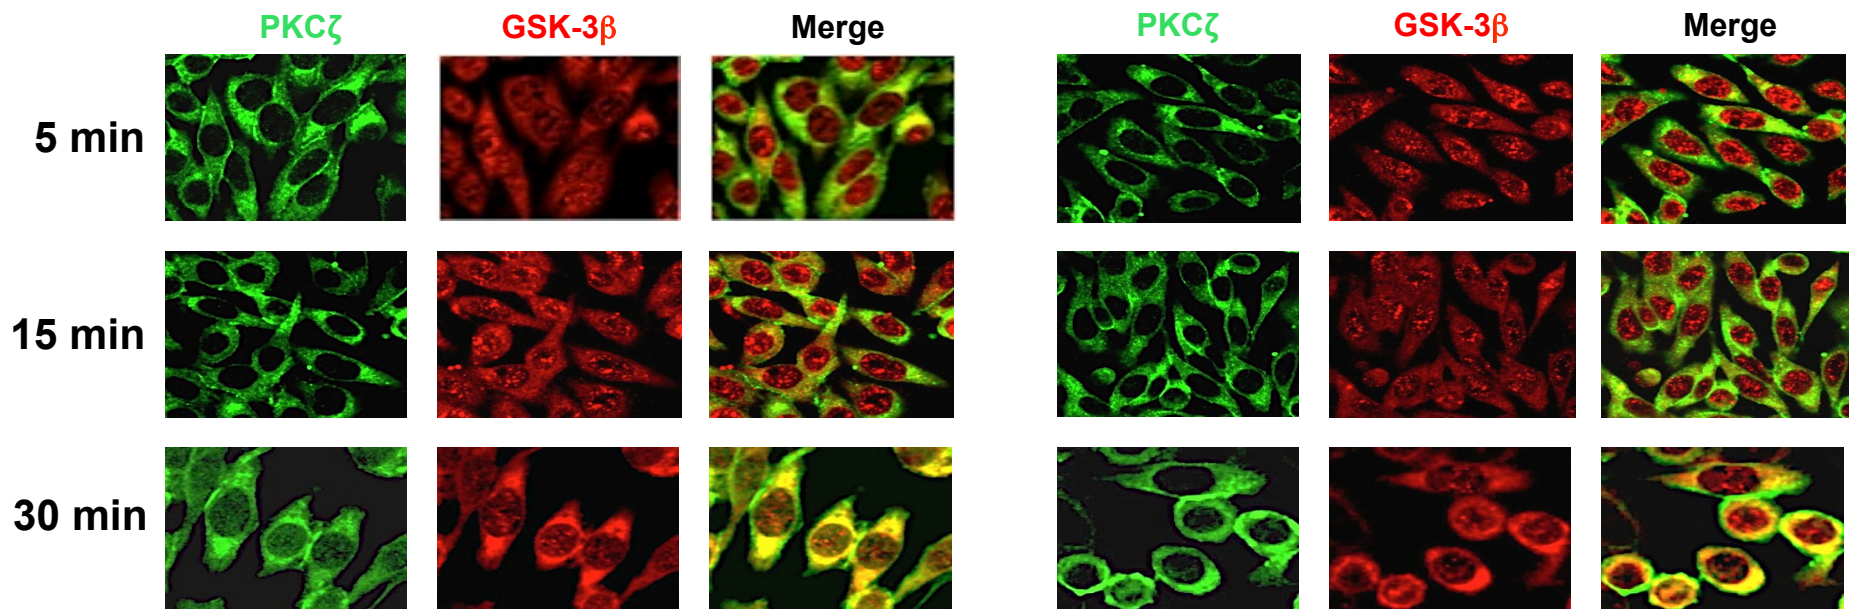

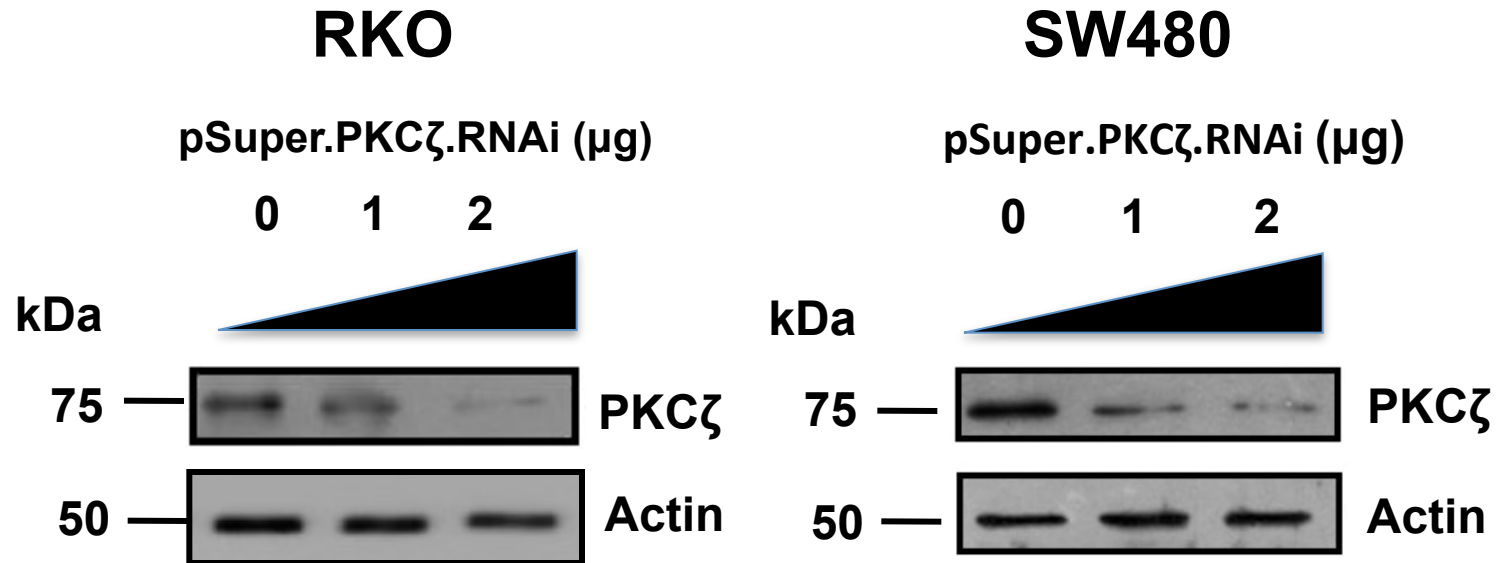

**Figure S2. Efficiency of the knockdown of PKC $\zeta$ .** RKO or SW480 cells were transfected with 2  $\mu$ g of pSuperPKC $\zeta$ -RNAi plasmid or with control pSuper plasmid using Lipofectamine 2000. The efficiency of the silencing of PKC $\zeta$  was determined 36 h post-transfection of cells by Western blot.

>gi|21361340|ref|NP\_002084.2| glycogen synthase kinase-3 beta isoform 1 [Homo sapiens]

MSGRPRTTSFAESCKPVQQPSAFGSMKVSRDKDGSKVTTVVATPGQGPDRPQEVSYTDTKVIGNGSFGVVYQAKLCDSGE  
 LVAIKKVLQDKRFKNRELQIMRKL~~DHCNIVRLR~~YFFYSSGEKKDEVYLNLVLDYVPETVYRVARHYSRAKOTLPVIYVKL  
YMYQLFRSLAYIHSFGICHRDIKPQNLLLDPDTAVLKLCDFGSAKQLVRGEPNVSYICSRYYRAPELIFGATDYTSSIDV  
 WSAGCVLAELLLGQPIFPGDSGVDQLVEIIKVLGTPTREQIREMNPNYTEFKFPQIKAHPWTKDSSGTGHFTSGVRVFRP  
RTPPEAIALCSRLLEYTPTARLTPLEACAHSFFDELRDPNVKLPNGRDTPALFNFTTQELSSNPPLATILIPPHARIQAA  
 ASTPTNATAASDANTGDRGQTNNAASASASNST

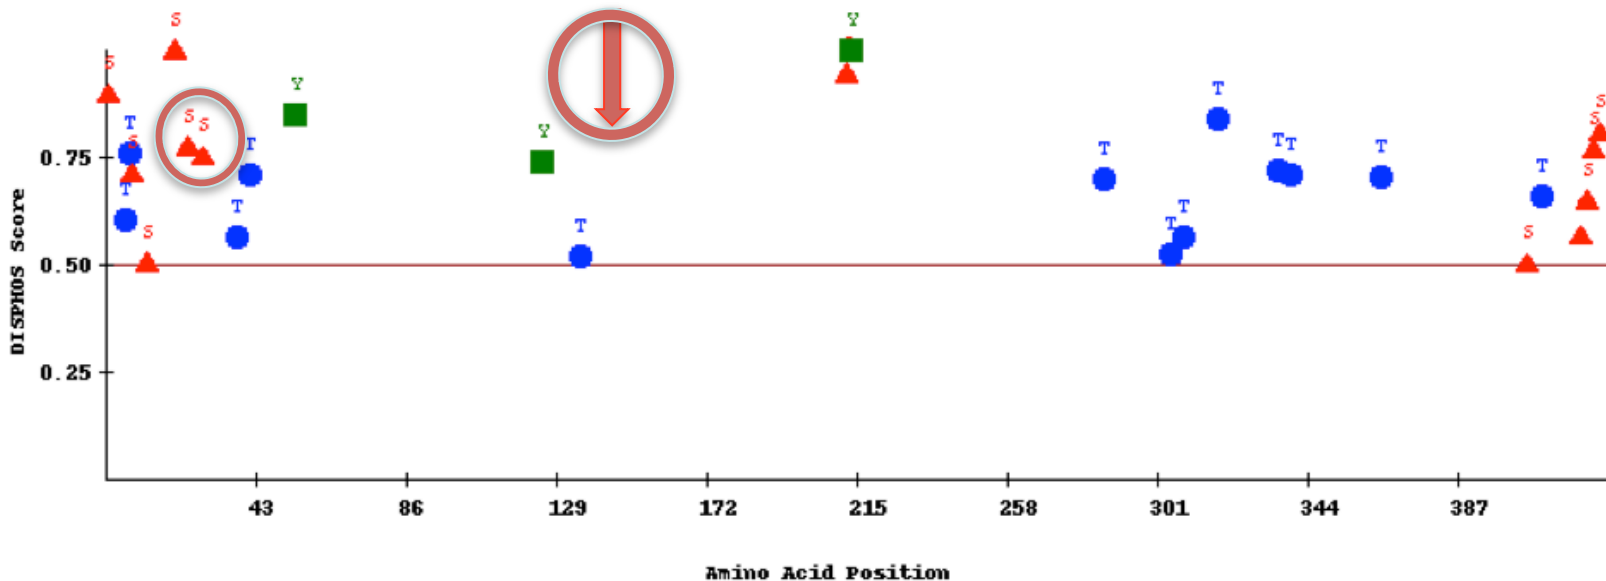

<http://www.dabi.temple.edu/disphos/pred/predict>

**Figure S3. Putative PKC phosphorylation sites in GSK-3 $\beta$  (NetphosK 2.0)** The sites obtained from the analysis appear underlined in black; three sites displaying the classical PKC consensus sequence with high probability score are underlined in red, and the Serine 147, that exactly matched with the consensus sequence recognized by the P-Ser-PKC-substrate antibody used in the experiments ( $R/K_{(0-2)}$  Ser X<sub>(hydrophobic)</sub> R/K) is shown underlined with a curly red line.

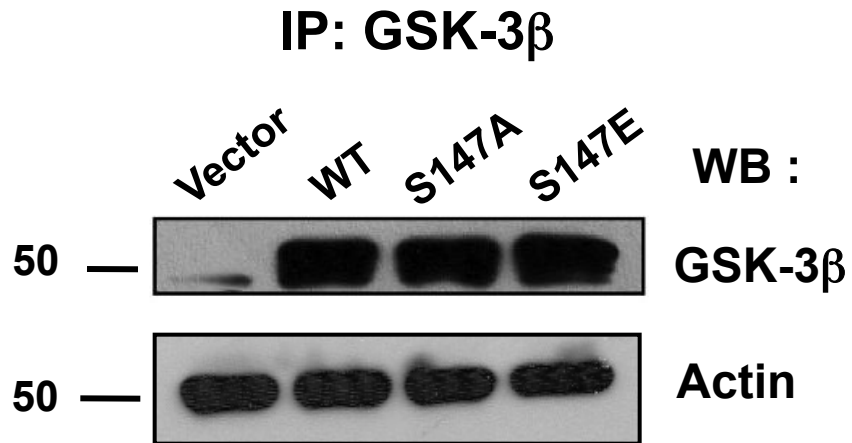

**Figure S4. Efficiency of transfection of GSK-3 $\beta$  wild-type, GSK-3 $\beta$ /S147A and GSK-3 $\beta$ /S147E.** RKO cells were transfected with the void plasmid (vector) or with plasmid-encoding wild type GSK-3 $\beta$  or plasmid-encoding GSK-3 $\beta$  mutants. GSK-3 $\beta$  was immunoprecipitated 24 h post-transfection from cell extracts and analyzed by Western blot. Actin antibody was used to control for equal loading. The results are representative of three independent experiments using different cell preparations.
